# Supplementary material for: Clinical and molecular features of 66 patients with musculocontractural Ehlers−Danlos syndrome caused by pathogenic variants in CHST14 (mcEDS-CHST14)
Source: PubMed Central journal article supplement — J Med Genet. 2021 Nov 23;59(9):865–77. doi: 10.1136/jmedgenet-2020-107623 (PMC9411915; doi:10.1136/jmedgenet-2020-107623), 2021-11-23
Supplement: jmedgenet-2020-107623supp002.pdf [file jmedgenet-2020-107623supp002.pdf]

**Supplementary Table S1.** Clinical issues (physical features, events, complications and treatment) described in a single patient with mcEDS-*CHST14*

|                                         |                                                                                                                                                                                                                                                                                                                                                                                  |
|-----------------------------------------|----------------------------------------------------------------------------------------------------------------------------------------------------------------------------------------------------------------------------------------------------------------------------------------------------------------------------------------------------------------------------------|
| Events in deliveries                    | Denuded skin of the cheek during delivery, preterm delivery at 32 weeks of gestation, vacuum extraction, premature rupture of membranes                                                                                                                                                                                                                                          |
| Events in neonatal periods              | Hypoglycemia, admission to the neonatal intensive care unit, small for gestational age                                                                                                                                                                                                                                                                                           |
| Craniofacial features                   | Premature sagittal synostosis, large skull, triangular face, anterior hair whorl, low posterior hairline, epicanthus, deep-set eyes, puffy eyelids, upturned nose, shallow palate, bifid uvula, overbite, hypoplastic maxilla                                                                                                                                                    |
| Skeletal features                       | Carpal tunnel syndrome, dural ectasia, elbow bursitis, femoral anteversion, C5-6 luxation after falling, incomplete ossification of the C1 ring, unilateral vertebral fusion at T3-4, spondylolisthesis                                                                                                                                                                          |
| Cutaneous features                      | Sacral skin tag, ganglion of the foot, gray scalp hair, puffy lower limbs and feet, chronic ulcers, wrinkling skin (abdominal wall, dorsal hand/foot), sagging skin on the face and chest, cysts (buttock and knee), fetal finger pads, subcutaneous calcified spheroids, severe eczema, localized burning sensation of the skin, androgenic alopecia (woman), hyperpigmentation |
| Cardiovascular or related complications | Catheter-related large thrombus, infective endocarditis, epidural bleeding associated with obstructive hydrocephalus, subdural hematoma, postural orthostatic tachycardia syndrome, polymorphic ventricular extrasystoles                                                                                                                                                        |
| Gastrointestinal complications          | Hiatal hernia with gastroesophageal reflux, duodenal obstruction due to malrotation, abdominal bloating after eating, lower gastrointestinal tract hemorrhage, infralevator anal atresia, cholelithiasis                                                                                                                                                                         |
| Genitourinary abnormalities             | Horseshoe kidney, atresia of vas deferens, gross hematuria, double ureter and collecting system, hypoplastic labia majora                                                                                                                                                                                                                                                        |
| Ophthalmologic abnormalities            | Phthisis bulbi, irregular nasally displaced pupil, conjunctival injection, prominent bulging eyes, nasolacrimal duct stenosis, nocturnal lagophthalmos, Peter's anomaly, nystagmus                                                                                                                                                                                               |
| Otologic abnormalities                  | Narrow middle ear space, sensitivity to loud noise, cerumen impaction                                                                                                                                                                                                                                                                                                            |
| Structural brain anomalies              | Gray matter heterotopias, hydrocephalus, hippocampal hypoplasia, optic nerve hypoplasia, pachygyria                                                                                                                                                                                                                                                                              |

|                       |                                                                                                                                                                                                                                                                                                                                                                                                                                                        |
|-----------------------|--------------------------------------------------------------------------------------------------------------------------------------------------------------------------------------------------------------------------------------------------------------------------------------------------------------------------------------------------------------------------------------------------------------------------------------------------------|
| Neurological features | Brain contusion after falling, reduced deep tendon reflex, cerebral venous thrombosis, dysarthria, intraventricular hemorrhage, migraine, radicular pain, subarachnoid hemorrhage, syringomyelia                                                                                                                                                                                                                                                       |
| Muscular features     | Spontaneous rupture of abdominal muscles, thin and high diaphragm                                                                                                                                                                                                                                                                                                                                                                                      |
| Surgical indication   | Carpal tunnel syndrome, cataract, cleft lip/palate, duodenal obstruction due to malrotation, epiblepharon, epidural hematoma with obstructive hydrocephalus, exudative otitis media, femoral anteversion, fistula, cholelithiasis, hydrocephalus, infective endocarditis, low imperforate anus, massive skin necrosis, protruding coccyx, ptosis, sacral abscess, spinal hematoma, subcutaneous cyst, tethered spinal cord, tibial tuberosity fracture |
| Pharmacologic therapy | Medication for anxiety, asthma, depression, epilepsy, hyperlipidemia, hyperuricemia                                                                                                                                                                                                                                                                                                                                                                    |
