# Supplementary material for: Clinical and molecular features of 66 patients with musculocontractural Ehlers−Danlos syndrome caused by pathogenic variants in CHST14 (mcEDS-CHST14)
Source: HighWire-hosted journal article supplement (doi:10.1136/jmedgenet-2020-107623), 2021-11-23
Supplement: jmedgenet-2020-107623supp003_data_supplement.xlsx [file jmedgenet-2020-107623supp003_data_supplement.xlsx]

## Sheet: Sheet1
Supplementary Table S2. Characteristics and evaluation of variants detected in patients with mcEDS-CHST14
Variant		Number of families		in silico analyses								Population databases							Pathogenicity of novel variants (ACMGguideline)h
c.DNA	Protein			SIFTa	Polyphen2 HDIVb	Polyphen2 HVARc	LRTd	MutationTastere	MutationAssessorf	CADDg		gnomAD (All)	gnomAD (East Asia)	1000 genome	ESP6500	HGVD	BBJ		Evidences	Pathogenecity
c.2_10del	p.M1_R4del	2		NA	NA	NA	NA	NA	NA	NA		–	–	–	–	–	–
c.85_95del	p.R29Gfs*113	1		NA	NA	NA	NA	NA	NA	NA		–	–	–	–	–	–
c.145delG	p.V49*	3		NA	NA	NA	NA	NA	NA	NA		–	–	–	–	–	–
c.205A>T	p.K69*	1		-	-	-	D	A	-	36		–	–	–	–	–	–
c.390_397dup	p.Q133Rfs*14	1		NA	NA	NA	NA	NA	NA	NA		–	–	–	–	–	–
c.400C>G	p.R134G	1		D	D	D	D	D	L	27		–	–	–	–	–	–
c.410T>A	p.L137Q	1		D	D	D	D	D	L	24.3		–	–	–	–	–	–
c.410T>C	p.L137P	1		D	D	D	D	D	L	24		–	–	–	–	–	–		PM2, PM5, PP3, PP4	Likely Pathogenic
c.453dup	p.C152Lfs*10	1		NA	NA	NA	NA	NA	NA	NA		–	–	–	–	–	–
c.472_503del	p.A158fs*18	1		NA	NA	NA	NA	NA	NA	NA		–	–	–	–	–	–
c.485G>A	p.W162*	1		-	-	-	D	D	-	37		–	–	–	–	–	0.000066436 (1/15,052)		PVS1, PM2, PP4	Pathogenic
c.626T>C	p.F209S	10		D	D	D	D	D	M	28		0.00002 (6/251144)	0.0003 (6/18,386)	–	–	0.0004 (1/2,420)	0.0001989 (3/15,086)
c.638G>C	p.R213P	2		D	D	D	D	A	H	33		0.00003 (8/251182)	0 (0/18386)	–	–	–	–
c.652C>A	p.R218S	1		D	D	D	D	D	M	34		0.000004 (1/251276)	0 (0/18386)	–	–	–	–
c.653G>T	p.R218L	2		D	D	D	D	D	H	33		–	–	–	–	–	–		PM2, PM5, PP3, PP4	Likely Pathogenic
c.676_682delAAGTTTG insGCTATGGGGCT	p.K226fs*16	1		NA	NA	NA	NA	NA	NA	NA		–	–	–	–	–	–
c.722T>A	p.I241K	1		D	D	D	D	D	H	28.3		–	–	–	–	–	–		PM2, PM3, PP3, PP4	Likely Pathogenic
c.784G>A	p.E262K	2		D	D	D	D	D	M	33		0.00002 (6/282804)	0 (0/19954)	–	–	–	–
c.797dupA	p.W266*	1		NA	NA	NA	NA	NA	NA	NA		–	–	–	–	–	–
c.821G>C	p.R274P	1		T	B	B	D	D	N	22.3		–	–	–	–	–	–
c.838A>T	p.M280L	1		T	P	P	D	D	L	23.4		–	–	–	–	–	–
c.842C>T	p.P281L	20		D	D	D	D	D	M	29.9		–	–	–	–	–	0.00113 (17/15,042)
c.866G>C	p.C289S	1		D	D	D	D	D	H	26.1		–	–	–	–	–	–
c.878A>G	p.Y293C	5		D	D	D	D	A	H	26.5		0.00001 (1/251456)	0 (0/18394)	0.0002→0.00019 (1/5,008)	–	0.0004 (1/2,420)	–
c.958 C>T	p.R320*	1		-	-	-	N	D	-	38		0.000007 (2/282592)	0 (0/19952)	–	–	–	–		PVS1, PM2, PP4	Pathogenic
c.977_980dup	p.W327Cfs*29	1		NA	NA	NA	NA	NA	NA	NA		–	–	–	–	–	–
c.981_1000dup	p.E334Gfs*107	1		NA	NA	NA	NA	NA	NA	NA		–	–	–	–	–	–
a D, Damaging; T, Tolerated; b D, Probably Damaging; P, Possibly Damaging; B, Benign; c D, Probably Damaging; P, Possibly Damaging; B, Benign; d D, Deleterious; N, Neutral; U, Unknown; e A, Disease Causing Known (nonsence-mediated decay); D, Disease Causing; N, Polymorphism; Benign, P; Polymorphism Known; f H; Predicted Functional (High); M, Predicted Functional (Medium); L, Predicted Non-Functio…
